# Supplementary material for: Photo-Cleavable Peptide-Poly(Ethylene Glycol) Conjugate Surfaces for Light-Guided Control of Cell Adhesion
Source: PubMed Central journal article supplement (PMC7465029; doi:10.3390/mi11080762), 2020-08-08
Supplement: micromachines-11-00762-s001.pdf [file micromachines-11-00762-s001.pdf]

# Supplementary Materials: Photo-Cleavable Peptide-Poly(Ethylene Glycol) Conjugate Surfaces for Light-Guided Control of Cell Adhesion

Satoshi Yamaguchi, Yumi Takasaki, Shinya Yamahira and Teruyuki Nagamune

## 1. General Procedures and Materials for Organic Synthesis

4-[4-(1-Hydroxyethyl)-2-methoxy-5-nitrophenoxy]butyric acid (the photolabile linker) was purchased from Sigma-Aldrich (St. Louis, MO). *N*-Hydroxysuccinimide (NHS), *N*-(2-aminoethyl) maleimide hydrochloride, 1-(3-dimethylaminopropyl)-3-ethylcarbodiimide hydrochloride (WSC), dicyclohexylcarbodiimide (DCC), chloroformic acid 4-nitrophenyl ester, triethylamine (TEA) and *N,N*-diisopropylethylamine (DIPEA) were from Tokyo Chemical, Inc. (Tokyo, Japan). Sunbright PA050HC (NH<sub>2</sub>-PEG5000-COOH) was from NOF Corporation (Tokyo, Japan).

All other reagents were commercially available and used as supplied without further purification. Column chromatography was performed on a silica gel provided by Kanto Chemical Co. Inc. (60N spherical, 40–50 μm). NMR chemical shifts are reported in ppm downfield of tetramethylsilane using a residual solvent as an internal reference. NMR spectra were recorded with a FT-NMR spectrometer (JEOL; JNM-A500) using a NM-50TH5 probe (500 MHz).

## 2. Synthesis of PEG-PL-Mal 1

A substrate-coating reagent, PEG-PL-Mal 1 was synthesized in simple five steps from a commercially available starting compound 2 (Scheme 1). The details of the synthetic reactions were shown as follows:

### *Synthesis of 3.*

4-[4-(1-Hydroxyethyl)-2-methoxy-5-nitrophenoxy]butyric acid (2) (150 mg, 0.50 mmol) and NHS (85.2 mg, 0.74 mmol) was dried up and then dissolved into a mixture of dry THF (2 mL) and dry DMF (0.3 mL) in Ar atmosphere. Then, WSC (140 mg, 0.73 mmol) was added to start reaction. After reacted for 1 day, the solvent was removed by evaporator to obtain crude product. The crude product was suspended in 5 mL of H<sub>2</sub>O, and the yellow solid of 3 was separated by filtration, followed with drying in a vacuum. Yellow solid of 3 was obtained (181 mg, yield: 91 %).

<sup>1</sup>H-NMR of one (500 MHz, CD<sub>3</sub>OD) δ: 7.59 (s, 1H), 7.29 (s, 1H), 5.56 (q, 1H), 4.17 (t, 2H), 3.99 (s, 3H), 2.85 (dt, 6H), 2.30 (m, 2H), 1.56 (d, 3H).

### *Synthesis of 4.*

Compound 3 (150 mg, 0.38 mmol) and *N*-(2-Aminoethyl) maleimide hydrochloride (80.5 mg, 0.45 mmol) were dried up and then dissolved into 4 ml of dry DCM in Ar atmosphere. Then, anhydrous DIPEA (250 μl, 1.40 mmol) were added to start reaction. After reacted for 6 h, the reaction mixture was concentrated by evaporator, and the product was purified with silica column chromatography (DCM/MeOH: 12/1). Yellow solid of 4 was obtained (101 mg, yield: 63 %).

<sup>1</sup>H-NMR of one (500 MHz, CD<sub>3</sub>OD) δ: 7.57 (s, 1H), 7.30 (s, 1H), 6.69 (s, 2H), 6.03 (bs, 1H), 5.56 (q, 1H), 4.09 (t, 2H), 3.98 (s, 3H), 3.69 (t, 2H), 3.47 (t, 2H), 2.37 (t, 2H), 2.16 (m, 2H), 1.56 (d, 3H).

### *Synthesis of 5.*

Compound 4 (65.0 mg, 0.15 mmol) and 4-nitrophenyl chloroformate (54.5 mg, 0.27 mmol) were dried up and then dissolved into 2 ml of dry DMF in Ar atmosphere. Then, anhydrous DIPEA (257 μl, 1.44 mmol) were added to start reaction. After reacted for 5 h, the reaction mixture was

concentrated by evaporator, and the product was purified with silica column chromatography (AcOEt/Hexane: = 6/1). Yellow solid of **5** was obtained (44.5 mg, yield: 49 %).

<sup>1</sup>H-NMR of one (500 MHz, CD<sub>3</sub>OD) δ: 8.26 (d, 2H), 7.60 (s, 1H), 7.34 (d, 2H), 7.11 (s, 1H), 6.69 (s, 2H), 6.52 (q, 1H), 6.12 (bs, 1H), 4.10 (t, 2H), 4.01 (s, 3H), 3.70 (t, 2H), 3.46 (t, 2H), 2.37 (t, 2H), 2.17 (m, 2H), 1.78 (d, 3H).

#### *Synthesis of 6.*

Compound **5** (35.9 mg, 62 μmol) and Sunbright PA-050HC (126.0 mg, 25 μmol) were dried up and then dissolved into 3 ml of dry DCM in Ar atmosphere. Then, anhydrous TEA (210 μl, 1.5 mmol) were added to start reaction. After reacted for 5 h, the reaction mixture was concentrated by evaporator, and the product was precipitated by adding 50 mL of cold diethylether (-20 °C), followed by centrifugation at 10000 g for 10 min at -20 °C. The supernatant was removed by decantation, and the product was dried in a vacuum. White solid of **6** was obtained (123 mg, yield: 90 %).

<sup>1</sup>H-NMR of one (500 MHz, CD<sub>3</sub>OD) 7.57 (s, 1H), 7.00 (s, 1H), 6.68 (s, 2H), 6.33 (q, 1H), 6.16 (bs, 1H), 5.60 (bs, 1H), 4.07 (t, 2H), 3.95 (s, 3H), 3.82 (t, 2H), 3.63-3.47 (bm, PEG), 3.25 (m, 2H), 2.34 (dt, 4H), 2.16 (m, 2H), 1.75 (m, 2H), 1.65-1.41 (bm, 9H).

#### *Synthesis of PEG-PL-Mal (1).*

Compound **6** (123 mg, 23 μmol) and NHS (5.40 mg, 47 μmol) were dried up and then dissolved into 2 ml of dry DCM in Ar atmosphere. Then, DCC (11.0 mg, 53 μmol) were added to start reaction. After reacted for 4 h, the reaction mixture was filtered, concentrated and then precipitated by adding 80 mL of diethyl ether, followed by centrifugation at 10000 g for 10 min at -10 °C. The supernatant was removed by decantation, and the product was dried in a vacuum. White solid of **1** was obtained (134 mg, yield: >99 %).

<sup>1</sup>H-NMR of one (500 MHz, CD<sub>3</sub>OD) 7.57 (s, 1H), 7.01 (s, 1H), 6.68 (s, 2H), 6.33 (q, 1H), 6.16 (bs, 1H), 5.60 (bs, 1H), 4.08 (t, 2H), 3.95 (s, 3H), 3.82 (t, 2H), 3.63-3.47 (bm, PEG), 3.22 (m, 2H), 2.85 (bt, 4H), 2.61 (t, 2H), 2.37 (t, 2H), 2.15 (m, 2H), 1.77 (bm, 4H), 1.61 (bm, 5H), 1.48 (bm, 2H).

### **3. <sup>1</sup>H-NMR Analysis of the Photocleavage of PEG-PL-Mal 1**

A solution of PEG-PL-Mal **1** (2 mM, in CDCl<sub>3</sub>) was put into a glass vial and exposed to various doses of light (365 nm) with a xenon light source through a band-pass filter (± 5 nm; MAX-302, from Asahi Spectra Co. Ltd., Tokyo, Japan). Then, the <sup>1</sup>H-NMR spectra of the light-irradiated solutions were measured (Figure S1).

The chemical shifts of the proton x and y of PEG-PL-Mal **1** disappeared after exposure to light at 20.3 J/cm<sup>2</sup>, and simultaneously, those of proton x' and y' of the photocleaved product appeared (Figure S1). Here, the perfect cleavage of high-concentrate PEG-PL-Mal **1** required a high dose of light. But, on the substrate, the required dose of light was extremely lower because the amount of the material on the surface is very small.

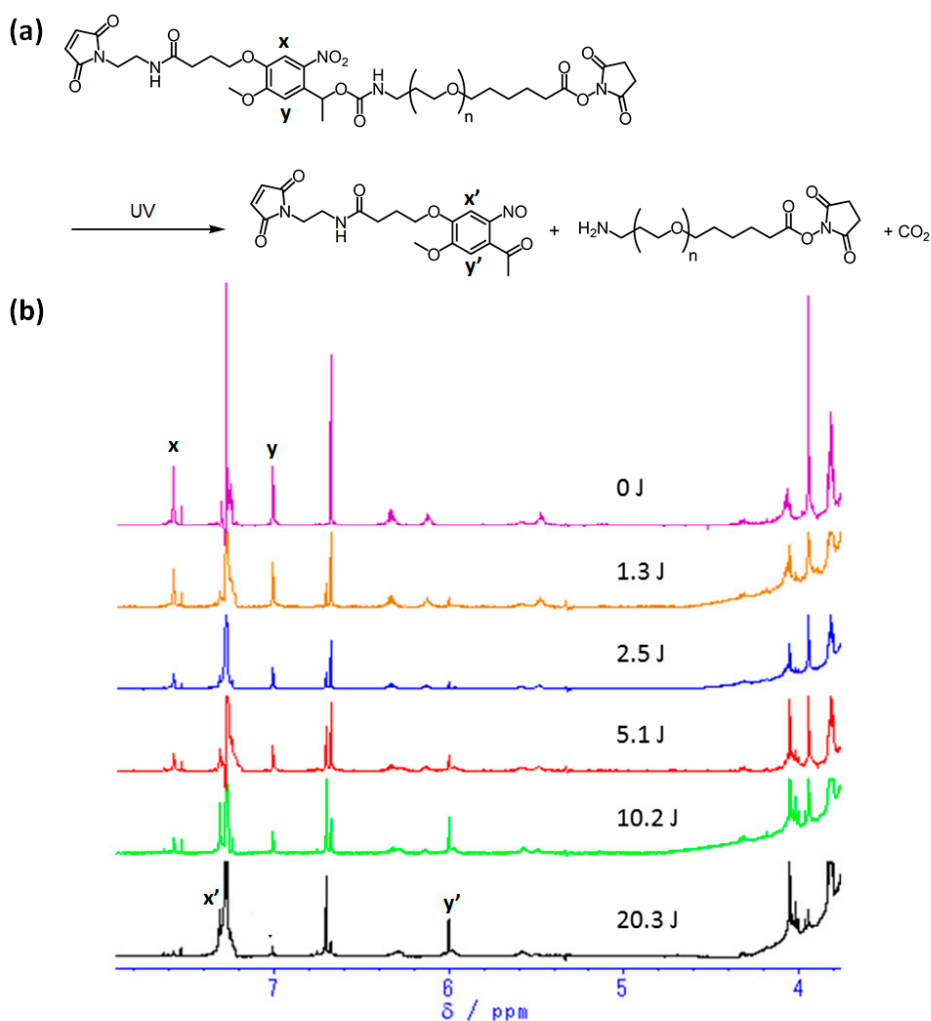

**Figure S1.**  $^1\text{H-NMR}$  analysis of the photocleavage of PEG-PL-Mal **1**. (a) The scheme of the photocleavage reaction. (b) The  $^1\text{H-NMR}$  spectra of the PEG-PL-Mal **1** solution after exposure to light at  $0 \sim 20.3 \text{ J/cm}^2$ .

#### 4. Morphological observation of the light-exposed cells

Human cervical carcinoma (HeLa cell) was seeded on plastic culture plates and cultured as described at the Materials and Methods section 2.4. A part of the dish surface was exposed to light ( $4.0 \text{ J/cm}^2$ :  $5.5 \text{ mW/cm}^2 \times 727.2 \text{ sec}$ ) with an ultraviolet (UV) irradiator (LAX-102, from Asahi Spectra Co., Ltd., Tokyo, Japan) equipped with a cylindrical lens through a bandpass filter (wavelength:  $365 \pm 5 \text{ nm}$ ). Then, the dish surface was rinsed with serum-free Dulbecco's modified eagle's medium (DMEM) by pipetting to flush detached cells from the surface. The boundary region between the light-exposed and unexposed regions were observed with a fluorescent microscope (IX81, from Olympus Corp., Tokyo, Japan) before and after exposure to light and after rinsing.

Figure S2 shows the microscopic images of light-exposed HeLa cells in almost the same area before and after light exposure and after rinsing. No morphological change in the light-exposed region was observed before and after light exposure (Figure S2a and 2b, *upper*). The cell density in the light-exposed region did not change before and after rinsing (Figure S2b and 2c, *upper*).

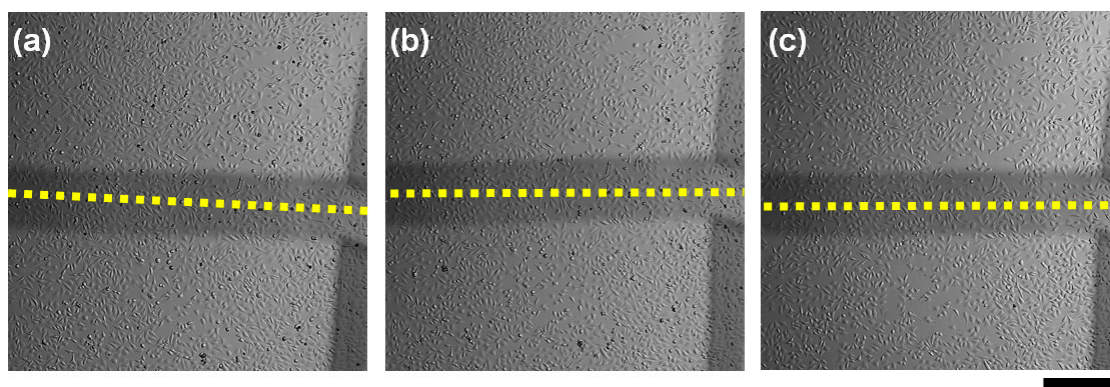

**Figure S2.** Microscopic images of the light-exposed HeLa cells on plastic culture dishes. (a) Before and (b) after exposure to light and (c) after rinsing. The yellow dotted line shows the boundary between the light-exposed region (*upper*) and unexposed region (*lower*). Scale bars: 500  $\mu\text{m}$ .

### 5. Viability Assay of the Photo-Released Cells

The photocleavable RGD-PEG surface was prepared as described at the Materials and Methods section 2.3. Human cervical carcinoma (HeLa cell,  $5.0 \times 10^5$  cells/mL) was seeded and attached on the surface by incubation for 2 hours as described at the Materials and Methods section 2.4. The cell-attached surface was rinsed with serum-free Dulbecco's modified eagle's medium (DMEM) by pipetting to flush weakly adsorbed cells from the surface. Then, a part of the cell-attached surface was exposed to light ( $4.0 \text{ J/cm}^2$ ) with an ultraviolet (UV) irradiator (LAX-102, from Asahi Spectra Co., Ltd., Tokyo, Japan) equipped with a cylindrical lens through a bandpass filter (wavelength:  $365 \pm 5$  nm). The photo-released cells were collected with the medium. The remaining cells at the unirradiated region were harvested from the substrate as a control by the trypsin/EDTA treatment. A part of the collected cells was stained with Trypan Blue, and then, both the stained and non-stained cells were counted with a microscope. The viability was determined by dividing the number of the stained cells with that of the total cells. As a result, the viability of the photo-released and enzymatically released cells were 97 % and 100 %, respectively. Furthermore, another part of the photo-released cells was stained with Calcein-AM, followed with observation by fluorescence microscopy.

Figure S3 shows the microscopic images of the Calcein-AM-stained cells. Almost all cells were observed to emit the green fluorescence, indicating that almost all cells were alive as shown by Trypan Blue staining.

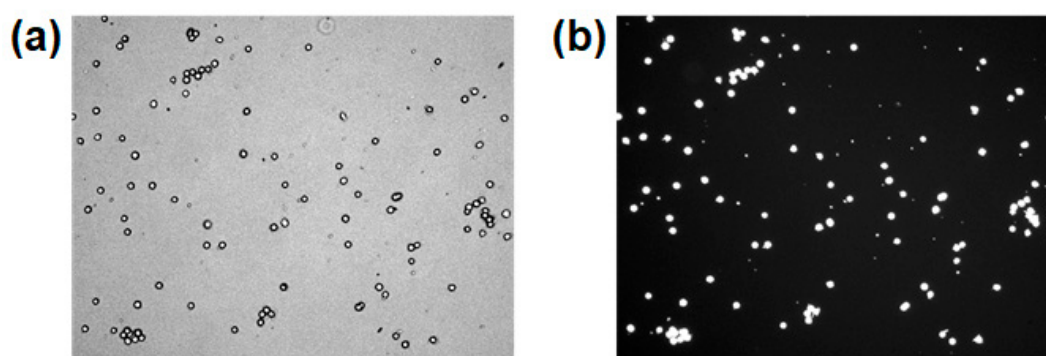

**Figure S3.** Microscopic images of the photo-released HeLa cells from the photocleavable RGD-PEG surface after Calcein-AM staining. (a) Bright-field image. (b) Green fluorescent image.
